# Supplementary material for: Comprehensive utilization of lignocellulosic biomass for the electrode and electrolyte in zinc-ion hybrid supercapacitors
Source: Royal Society of Chemistry journal article supplement (doi:10.1039/d2ta06835d), 2022-01-01
Supplement: d2ta06835d1.pdf [file d2ta06835d1.pdf]

Supplementary Information

**Comprehensive utilization of lignocellulosic biomass for electrode and electrolyte in zinc-ion  
hybrid supercapacitor**

Lvyue Yang, Luan Yang, Dingliang Dai, Jianfeng Yao\*

College of Chemical Engineering, Jiangsu Co-Innovation Center of Efficient Processing and  
Utilization of Forest Resources, Nanjing Forestry University, Nanjing, Jiangsu 210037, China.

\*Corresponding author. Email: jfyao@njfu.edu.cn

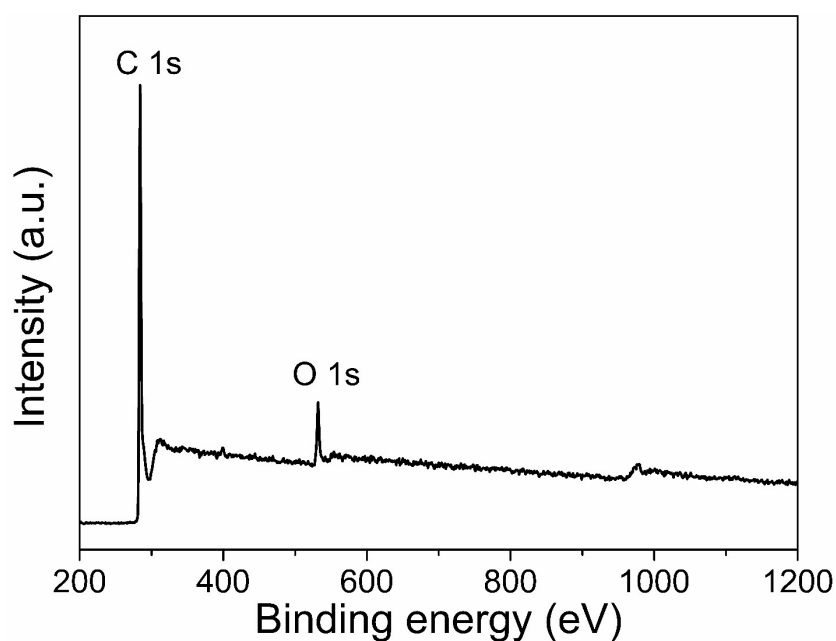

**Fig. S1** XPS full-spectrum of LDC3.

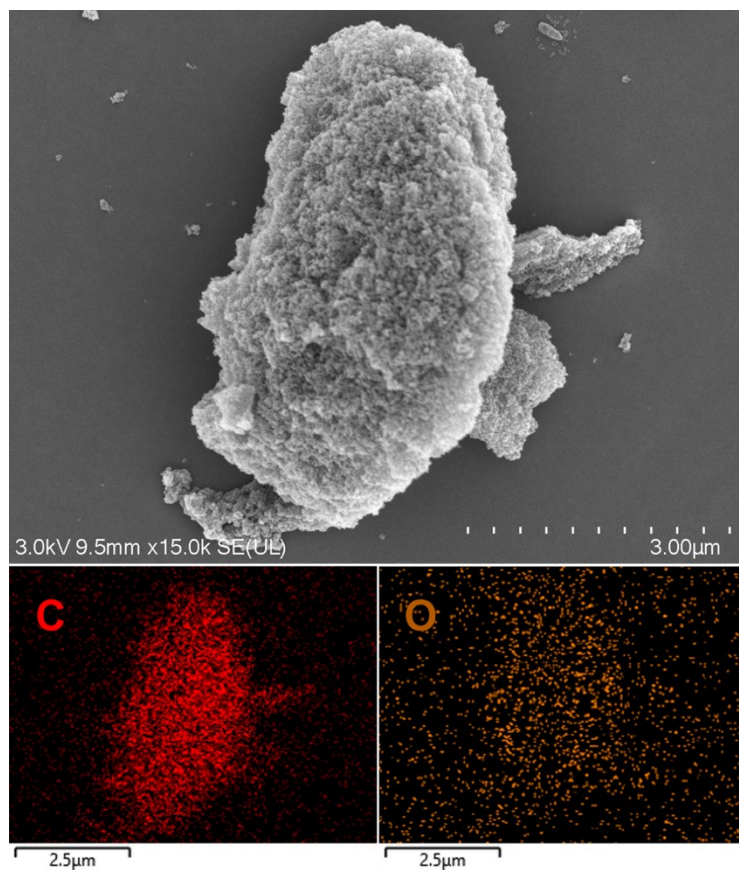

**Fig. S2** SEM image and elemental mapping images of LDC3.

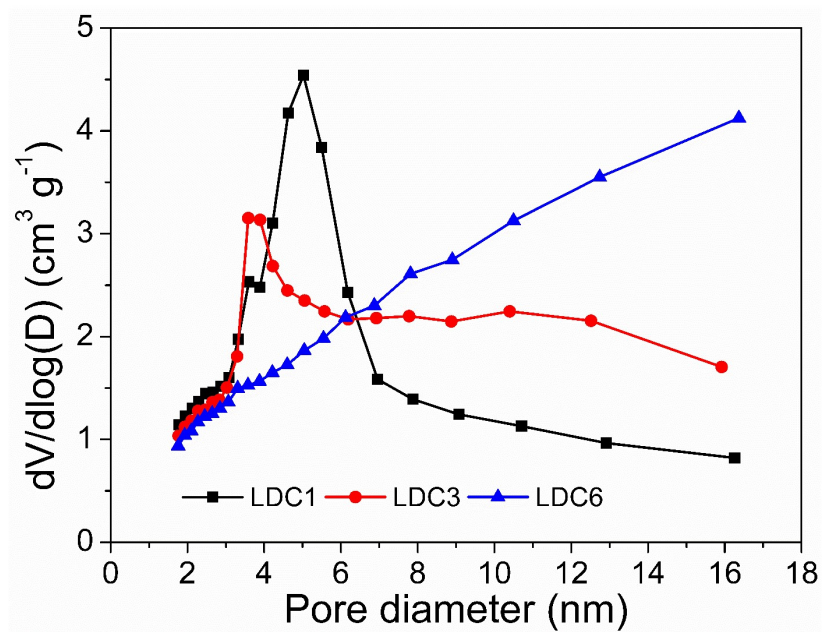

**Fig. S3** BJH pore size distributions of carbon samples of LDCx.

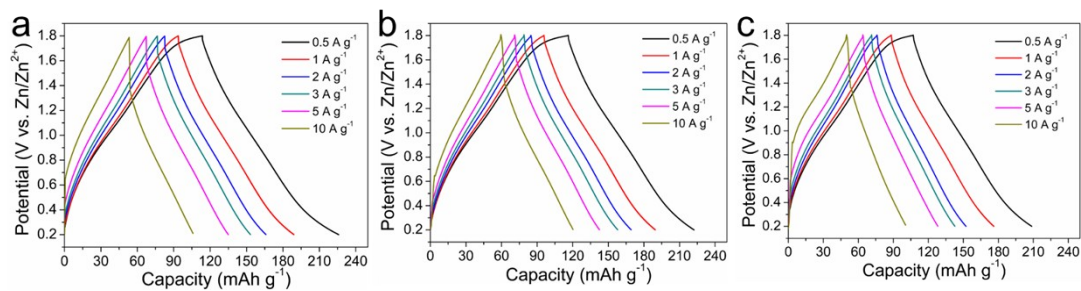

**Fig. S4** GCD curves of LDC1 (a), LDC3 (b) and LDC6 (c) with a 73 wt% ZnCl<sub>2</sub> aqueous solution as electrolyte at different current densities.

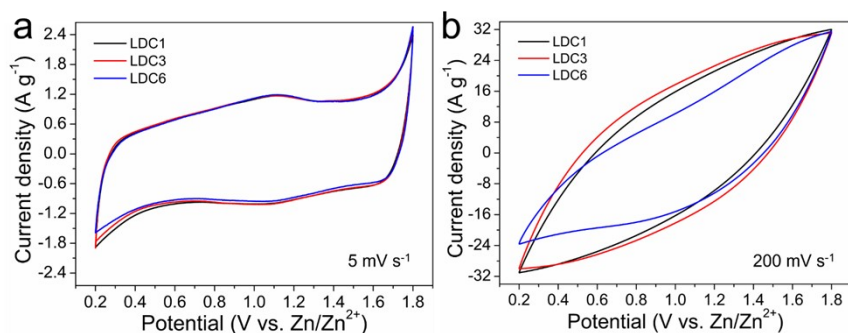

**Fig. S5** CV curves of LDCx at the scan rates of 5 mV s<sup>-1</sup> (a) and 200 mV s<sup>-1</sup> (b) respectively.

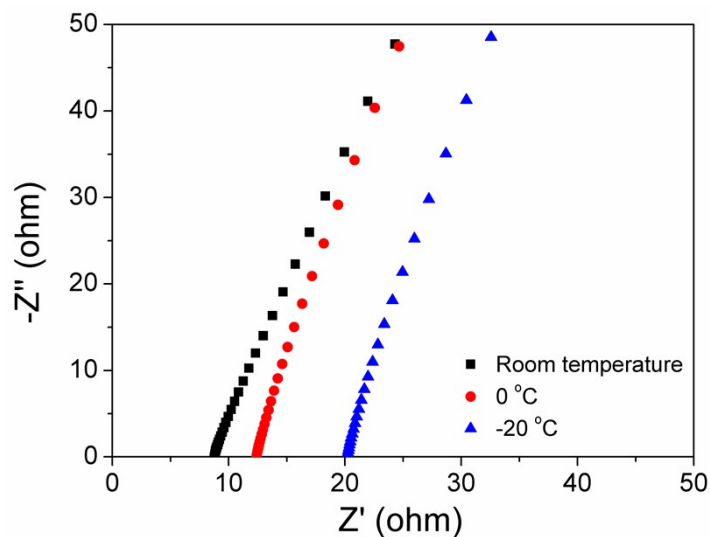

**Fig. S6** Nyquist plots of LDH3 at different temperatures

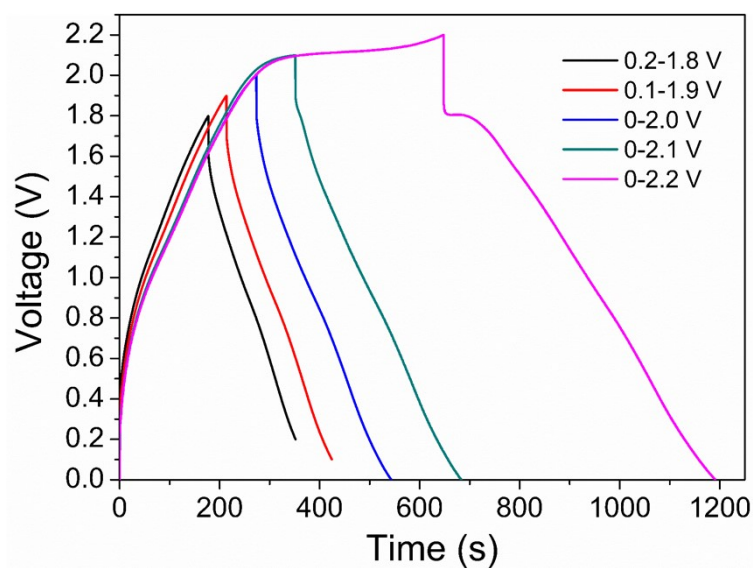

**Fig. S7** GCD curves ( $2 \text{ A g}^{-1}$ ) of ZHS with LDC3 and LDH3 at different voltage windows.

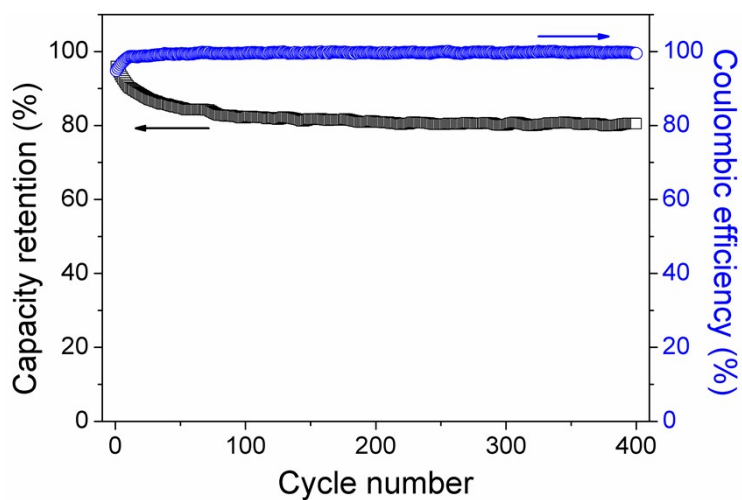

**Fig. S8** GCD cycles of the zinc-ion hybrid supercapacitor (Zn/LDH3/LDC3) at  $0.5 \text{ A g}^{-1}$ .

**Table S1** Components of sawdust and washed solid residues after hydrothermal treatment.

| Sample  | Solid yield | Cellulose | Hemicellulose | Lignin | Others |
|---------|-------------|-----------|---------------|--------|--------|
| Sawdust | 100%        | 41.3%     | 17.2%         | 34.6%  | 6.9%   |
| WSR1    | 75%         | 40.7%     | 11.3%         | 45.3%  | 2.7%   |
| WSR3    | 60%         | 43.2%     | 8.1%          | 46.6%  | 2.1%   |
| WSR6    | 29%         | 45.6%     | 5.4%          | 47.2%  | 1.8%   |

**Table S2** Comprehensive comparison of various zinc-ion hybrid supercapacitors.

| Research in the main text | Cathode material                       | Electrolyte                                                        | Voltage | Energy density/<br>Power density                                                                                  | Capacity retention/<br>Cycle number/<br>Current density |
|---------------------------|----------------------------------------|--------------------------------------------------------------------|---------|-------------------------------------------------------------------------------------------------------------------|---------------------------------------------------------|
| <b>This work</b>          | Lignocellulosic biomass-derived carbon | Lignocellulosic biomass-derived hydrogel with [ZnCl <sub>2</sub> ] | 2 V     | 65 Wh kg <sup>-1</sup> at<br>7.52 kW kg <sup>-1</sup> and<br>226 Wh kg <sup>-1</sup> at<br>492 W kg <sup>-1</sup> | 100%/ 30000/ 5 A g <sup>-1</sup>                        |
| Ref. 3                    | Commercial activated carbon            | 2 M aqueous ZnSO <sub>4</sub>                                      | 1.6 V   | 30 Wh kg <sup>-1</sup> at<br>14.9 kW kg <sup>-1</sup>                                                             | 91%/ 10000/ 1 A g <sup>-1</sup>                         |
| Ref. 5                    | Silk-derived activated carbon          | PAM hydrogel with [ZnCl <sub>2</sub> ]                             | 1.8 V   | 217 Wh kg <sup>-1</sup> at<br>450 W kg <sup>-1</sup>                                                              | 95%/ 100000/ 5 A g <sup>-1</sup>                        |
| Ref. 7                    | N/P co-doped graphene                  | 1 M aqueous ZnSO <sub>4</sub>                                      | 1.8 V   | 95 Wh kg <sup>-1</sup> at 450<br>W kg <sup>-1</sup>                                                               | 82%/ 15000/ 10 A g <sup>-1</sup>                        |
| Ref. 12                   | Coconut shell activated carbon         | PVA/MMT hydrogel with [Zn(ClO <sub>4</sub> ) <sub>2</sub> ]        | 1.8 V   | 190 W h kg <sup>-1</sup> at<br>90 W kg <sup>-1</sup>                                                              | 99%/ 10000/ 5 A g <sup>-1</sup>                         |
| Ref. 25                   | Ethanol-derived porous carbon          | Gelatin gel with [ZnSO <sub>4</sub> ]                              | 1.6 V   | 82 W h kg <sup>-1</sup> at<br>104 W kg <sup>-1</sup>                                                              | 88%/ 10000/ 1 A g <sup>-1</sup>                         |
| Ref. 26                   | Porous carbon nanofiber                | 2 M aqueous ZnCl <sub>2</sub>                                      | 1.6 V   | 143 Wh kg <sup>-1</sup> at<br>367 W kg <sup>-1</sup>                                                              | 93%/ 10000/ 10 A g <sup>-1</sup>                        |
| Ref. 28                   | Cross-linked porous carbon nanosheets  | PVA gel with [Zn(Ac) <sub>2</sub> /KOH]                            | 1.6 V   | 89 Wh kg <sup>-1</sup> at 79<br>W kg <sup>-1</sup>                                                                | 102 %/ 10000/ 5 A g <sup>-1</sup>                       |
| Ref. 34                   | Potassium citrate derived carbon       | 1 M aqueous Zn(CF <sub>3</sub> SO <sub>3</sub> ) <sub>2</sub>      | 1.6 V   | 125 Wh kg <sup>-1</sup> at 76<br>W kg <sup>-1</sup>                                                               | 93%/ 60000/ 10 A g <sup>-1</sup>                        |
| Ref. 48                   | Chitosan derived porous carbon         | 2 M aqueous ZnSO <sub>4</sub>                                      | 1.6 V   | 93 Wh kg <sup>-1</sup> at<br>3633 W kg <sup>-1</sup>                                                              | 91%/ 5000/ 1 A g <sup>-1</sup>                          |

**Ref. 3** L. Dong, X. Ma, Y. Li, L. Zhao, W. Liu, J. Cheng, C. Xu, B. Li, Q.-H. Yang and F. Kang, *Energy Storage Mater.*, 2018, **13**, 96-102.

**Ref. 5** C. Wang, Z. Pei, Q. Meng, C. Zhang, X. Sui, Z. Yuan, S. Wang and Y. Chen, *Angew. Chem. Int. Edit.*, 2021, **60**, 990-997.

**Ref. 7** Y. Zhao, H. Hao, T. Song, X. Wang, C. Li and W. Li, *J. Power Sources*, 2022, **521**, 230941.

**Ref. 12** G. Yang, J. Huang, X. Wan, Y. Zhu, B. Liu, J. Wang, P. Hiralal, O. Fontaine, Y. Guo and H. Zhou, *Nano Energy*, 2021, **90**, 106500.

**Ref. 25** Y. Zheng, W. Zhao, D. Jia, Y. Liu, L. Cui, D. Wei, R. Zheng and J. Liu, *Chem. Eng. J.*, 2020, **387**, 124161.

**Ref. 26** A. Amiri, M. Naraghi and A. A. Polycarpou, *J. Energy Chem.*, 2022, **70**, 480-491.

**Ref. 28** H. Zhang, Z. Chen, Y. Zhang, Z. Ma, Y. Zhang, L. Bai and L. Sun, *J. Mater. Chem. A*, 2021, **9**, 16565-16574.

**Ref. 34** L. Wang, M. Huang, J. Huang, X. Tang, L. Li, M. Peng, K. Zhang, T. Hu, K. Yuan and Y. Chen, *J. Mater. Chem. A*, 2021, **9**, 15404-15414.

**Ref. 48** P. Liu, Y. Gao, Y. Tan, W. Liu, Y. Huang, J. Yan and K. Liu, *Nano Res.*, 2019, **12**, 2835-2841.
